# Supplementary material for: Comparison of Diazotrophic Composition and Distribution in the South China Sea and the Western Pacific Ocean
Source: MDPI journal article supplement (doi:10.3390/biology10060555), 2021-06-20
Supplement: s1 [file s1]

**Table S1.** The principal coordinates of neighbor matrices (PCNM) analysis based on geographic coordinates.

| Station | PCNM1   | PCNM2   | PCNM3   | PCNM4   | PCNM5   | PCNM6   | PCNM7   | PCNM8   | PCNM9   | PCNM10  | PCNM11  | PCNM12  | PCNM13  | PCNM14  |
|---------|---------|---------|---------|---------|---------|---------|---------|---------|---------|---------|---------|---------|---------|---------|
| 1       | -0.1037 | -0.2850 | -0.1176 | 0.3421  | -0.0982 | 0.0262  | 0.3245  | -0.1814 | -0.0406 | -0.0575 | 0.0231  | 0.5345  | 0.0970  | -0.0141 |
| 2       | -0.1138 | -0.2474 | -0.1250 | 0.0933  | 0.1744  | -0.0320 | -0.1312 | 0.0638  | -0.0315 | -0.2014 | 0.2305  | -0.2190 | -0.0398 | 0.0060  |
| 3       | -0.0469 | 0.4213  | 0.2196  | 0.2507  | 0.1750  | -0.4470 | 0.0806  | 0.0147  | 0.0124  | 0.0105  | -0.0245 | 0.0001  | 0.0000  | 0.0000  |
| 4       | -0.1146 | -0.2486 | -0.1258 | 0.0824  | 0.1707  | -0.0348 | -0.1341 | 0.0666  | -0.0563 | -0.0375 | 0.0100  | -0.1850 | -0.0327 | 0.0032  |
| 5       | -0.1325 | 0.0173  | 0.0189  | 0.0758  | -0.0081 | -0.0658 | 0.0487  | -0.0046 | 0.0063  | -0.6926 | -0.2175 | -0.1033 | -0.0240 | 0.0138  |
| 6       | -0.1235 | -0.1764 | -0.0863 | -0.1438 | -0.0912 | -0.0201 | 0.0203  | 0.0214  | 0.6415  | 0.0468  | -0.0239 | -0.0003 | -0.0001 | 0.0000  |
| 7       | -0.0704 | 0.3857  | 0.2036  | 0.0596  | -0.0721 | 0.4010  | -0.0591 | -0.0288 | -0.3744 | -0.0547 | 0.0039  | -0.0002 | 0.0000  | 0.0000  |
| 8       | -0.0923 | 0.2980  | 0.1581  | -0.3361 | -0.3369 | 0.0136  | 0.1353  | -0.0302 | 0.3768  | 0.0035  | -0.0104 | 0.0004  | 0.0001  | 0.0000  |
| 9       | -0.1334 | 0.0483  | 0.0339  | 0.0429  | -0.0208 | -0.0715 | 0.0368  | 0.0083  | -0.0493 | 0.1739  | 0.4815  | 0.0084  | -0.0008 | 0.0047  |
| 10      | -0.1337 | 0.0454  | 0.0329  | 0.0590  | -0.0159 | -0.0702 | 0.0419  | 0.0049  | -0.0205 | -0.1185 | 0.5336  | -0.0361 | -0.0066 | 0.0014  |
| 11      | -0.1308 | -0.0811 | -0.0350 | -0.1284 | -0.1555 | 0.4013  | -0.0561 | -0.0165 | -0.0850 | -0.2103 | -0.0319 | -0.0280 | -0.0020 | -0.0055 |
| 12      | -0.1294 | -0.0735 | -0.0317 | -0.1486 | -0.1614 | 0.3994  | -0.0622 | -0.0132 | -0.1198 | 0.1960  | 0.0384  | 0.0263  | 0.0017  | 0.0055  |
| 13      | -0.1355 | 0.0292  | 0.0240  | 0.0351  | -0.0228 | -0.0708 | 0.0343  | 0.0101  | -0.0682 | 0.1048  | -0.2197 | 0.0257  | 0.0072  | -0.0055 |
| 14      | -0.1334 | 0.0308  | 0.0243  | 0.0182  | -0.0269 | -0.0714 | 0.0296  | 0.0109  | -0.0974 | 0.3921  | -0.3086 | 0.0649  | 0.0056  | 0.0109  |
| 15      | -0.1127 | -0.1903 | -0.0975 | -0.4335 | -0.2428 | -0.3479 | 0.1495  | -0.0239 | -0.2264 | -0.0435 | 0.0314  | -0.0002 | 0.0000  | 0.0000  |
| 16      | -0.1356 | 0.0225  | 0.0209  | 0.0450  | -0.0193 | -0.0695 | 0.0376  | 0.0072  | -0.0514 | -0.1256 | -0.3464 | -0.0047 | 0.0023  | -0.0061 |
| 17      | -0.1353 | 0.0384  | 0.0288  | 0.0400  | -0.0219 | -0.0713 | 0.0356  | 0.0102  | -0.0576 | 0.1222  | 0.1230  | 0.0173  | 0.0061  | -0.0063 |
| 18      | -0.1214 | 0.0876  | 0.0557  | 0.3712  | 0.1805  | 0.3010  | -0.1228 | 0.0345  | 0.4327  | 0.0650  | -0.0128 | 0.0002  | 0.0000  | 0.0000  |
| 19      | -0.1149 | -0.2474 | -0.1257 | 0.0622  | 0.1647  | -0.0396 | -0.1398 | 0.0712  | -0.0989 | 0.3089  | -0.2251 | -0.1249 | -0.0235 | 0.0048  |
| 20      | -0.1061 | 0.1557  | -0.0321 | -0.3734 | 0.3504  | -0.0553 | -0.3950 | 0.1534  | 0.0035  | -0.0146 | 0.0019  | -0.0015 | -0.0003 | 0.0000  |
| 21      | -0.1359 | 0.0282  | 0.0238  | 0.0432  | -0.0205 | -0.0703 | 0.0368  | 0.0089  | -0.0538 | -0.0358 | -0.1793 | 0.0047  | 0.0054  | -0.0091 |
| 22      | -0.1351 | 0.0389  | 0.0290  | 0.0380  | -0.0224 | -0.0714 | 0.0350  | 0.0104  | -0.0609 | 0.1581  | 0.1230  | 0.0221  | 0.0063  | -0.0050 |
| 23      | 0.2703  | 0.1115  | -0.2770 | 0.1306  | -0.2443 | -0.0706 | -0.2027 | -0.0443 | 0.0015  | 0.0009  | -0.0002 | 0.0525  | -0.3938 | -0.4471 |
| 24      | 0.2709  | 0.1106  | -0.2755 | 0.1326  | -0.2497 | -0.0726 | -0.2093 | -0.0339 | 0.0012  | -0.0008 | 0.0002  | -0.0528 | 0.3935  | 0.4393  |
| 25      | 0.3152  | 0.0273  | -0.1115 | 0.0021  | 0.0276  | 0.0892  | 0.3016  | 0.5107  | -0.0142 | -0.0004 | 0.0000  | -0.0008 | 0.0037  | -0.0025 |
| 26      | 0.2077  | 0.2004  | -0.3678 | -0.2457 | 0.3873  | 0.0419  | -0.0460 | -0.0907 | 0.0113  | -0.0936 | 0.0211  | 0.5312  | 0.0964  | -0.0140 |
| 27      | 0.2969  | -0.1070 | 0.1666  | 0.0899  | -0.2251 | -0.0800 | -0.2638 | 0.0894  | -0.0009 | -0.0047 | 0.0006  | 0.0946  | -0.4795 | -0.0006 |
| 28      | 0.2174  | 0.1638  | -0.3610 | 0.0074  | 0.1116  | 0.1004  | 0.4105  | -0.3310 | 0.0047  | 0.1025  | -0.0217 | -0.5311 | -0.0967 | 0.0244  |
| 29      | 0.2967  | -0.1086 | 0.1701  | 0.0864  | -0.2178 | -0.0781 | -0.2589 | 0.0773  | -0.0005 | -0.0033 | 0.0005  | -0.0926 | 0.4837  | -0.0010 |
| 30      | 0.2487  | -0.1635 | 0.3111  | -0.0975 | 0.1808  | 0.0769  | 0.2237  | 0.1664  | -0.0041 | -0.0004 | 0.0001  | 0.0708  | -0.3123 | 0.5460  |
| 31      | 0.2482  | -0.1634 | 0.3113  | -0.0985 | 0.1832  | 0.0767  | 0.2224  | 0.1502  | -0.0036 | 0.0008  | -0.0001 | -0.0708 | 0.3107  | -0.5543 |
| 32      | 0.2190  | -0.1686 | 0.3368  | -0.1019 | 0.1674  | -0.0174 | -0.1239 | -0.6919 | 0.0233  | 0.0092  | -0.0008 | -0.0021 | -0.0074 | 0.0110  |
